# Supplementary material
Source: publisher figshare collection journal article supplement (https://future-science-group.figshare.com/ndownloader/files/31811411)
Supplement: Supplementary file 1 [file 31811411]

Supplementary Table 3 Marker genes of cells

| Cells | Abbreviation | Marker genes |
| --- | --- | --- |
| Naive-state T cells | Naive T | CD3D, CD3E, CCR7 |
| Activated-state T cells | Activated T | CD3D, CD3E, PRF1 |
| Proliferative T cells | Pro T | CD3D, CD3E, MKI67 |
| Natural killer cells | NK | KLRF1 |
| B cells | B | MS4A1 |
| Plasma B cells | plasma | MZB1 |
| CD14+ monocytes | CD14+ mono | LYZ, CD14 |
| CD16+ monocytes | CD16+ mono | LYZ, FCGR3A |
| Monocyte-derived dendritic cells | Mono DCs | CD1C |
| Plasmacytoid dendritic cells | pDC | LILRA4 |
| Platelets | platelet | PPBP |
| Hemopoietic stem cells | HSC | CYTL1, GATA2 |
